# Supplementary material for: Multiple chronic conditions at a major urban health system: a retrospective cross-sectional analysis of frequencies, costs and comorbidity patterns
Source: PubMed Central journal article supplement — BMJ Open. 2019 Oct 15;9(10):e029340. doi: 10.1136/bmjopen-2019-029340 (PMC6797368; doi:10.1136/bmjopen-2019-029340), 2019-10-15
Supplement: bmjopen-2019-029340supp001.pdf [file bmjopen-2019-029340supp001.pdf]

## Supplementary Table 1

## Top 10 clusters by frequency

| Gender | Age   | Condition 1    | Condition 2                           | Total Attributable Cost | Average Yearly Cost | Average Yearly Membership |
|--------|-------|----------------|---------------------------------------|-------------------------|---------------------|---------------------------|
| F      | 50-65 | Hypertension   | Hyperlipidemia                        | \$93,122,272            | \$7,172             | 4,329                     |
| F      | 50-65 | Hypertension   | Diabetes Mellitus                     | \$72,878,330            | \$8,557             | 2,839                     |
| F      | 50-65 | Hyperlipidemia | Diabetes Mellitus                     | \$65,165,290            | \$8,143             | 2,668                     |
| M      | 50-65 | Hypertension   | Hyperlipidemia                        | \$61,719,638            | \$7,948             | 2,589                     |
| F      | 50-65 | Hypertension   | Degenerative eye problem (glauco/eye) | \$54,012,310            | \$8,240             | 2,185                     |
| F      | 50-65 | Hypertension   | Osteoarthritis                        | \$66,447,600            | \$10,166            | 2,179                     |
| F      | 50-65 | Hyperlipidemia | Degenerative eye problem (glauco/eye) | \$49,533,370            | \$7,674             | 2,152                     |
| F      | 50-65 | Hyperlipidemia | Osteoarthritis                        | \$56,171,247            | \$9,295             | 2,014                     |
| F      | 50-65 | Hypertension   | Esophageal disorder and GI ulcers     | \$60,965,767            | \$10,297            | 1,974                     |
| F      | 50-65 | Hyperlipidemia | Esophageal disorder and GI ulcers     | \$53,619,011            | \$9,194             | 1,944                     |

## Top 10 clusters by average yearly cost with 30 total member counts or more

| Gender | Age   | Condition 1                                           | Condition 2                                                                          | Total Attributable Cost | Average Yearly Cost | Average Yearly Membership |
|--------|-------|-------------------------------------------------------|--------------------------------------------------------------------------------------|-------------------------|---------------------|---------------------------|
| M      | 35-50 | Anemia and other non-cancer heme disorders            | Conduction disorder or cardiac dysrhythmia                                           | \$8,390,439             | \$90,220            | 31                        |
| F      | 50-65 | Pulmonary heart disease                               | Anemia and other non-cancer heme disorders                                           | \$7,542,310             | \$83,803            | 30                        |
| M      | 35-50 | Congestive heart failure                              | Malnutrition and F/E cond (not obesity/overweight) -includes disorders of metabolism | \$7,068,459             | \$77,675            | 30                        |
| M      | 50-65 | Conduction disorder or cardiac dysrhythmia            | Immunity disorder                                                                    | \$9,800,142             | \$76,564            | 43                        |
| M      | 35-50 | Other central and peripheral nervous system disorders | Immunity disorder                                                                    | \$6,917,900             | \$73,595            | 31                        |

|   |       |                                             |                                                               |              |          |    |
|---|-------|---------------------------------------------|---------------------------------------------------------------|--------------|----------|----|
| F | 50-65 | Congestive heart failure                    | Anemia and other non-cancer heme disorders                    | \$14,346,180 | \$70,671 | 68 |
| F | 50-65 | Congestive heart failure                    | Chronic skin ulcer                                            | \$7,852,354  | \$69,490 | 38 |
| M | 35-50 | Anemia and other non-cancer heme disorders  | Kidney and Vesicoureteral Disorders (excluding renal failure) | \$6,174,594  | \$68,607 | 30 |
| M | 65+   | Cardiomyopathy and Structural Heart Disease | Anemia and other non-cancer heme disorders                    | \$9,505,337  | \$67,414 | 47 |
| M | 35-50 | Congestive heart failure                    | Conduction disorder or cardiac dysrhythmia                    | \$7,077,370  | \$67,404 | 35 |

**Top 10 clusters by average yearly cost with 1,000 member counts or more**

| Gender | Age   | Condition 1                       | Condition 2                                           | Total Attributable Cost | Average Yearly Cost | Average Yearly Membership |
|--------|-------|-----------------------------------|-------------------------------------------------------|-------------------------|---------------------|---------------------------|
| F      | 50-65 | Hypertension                      | Coronary atherosclerosis                              | \$45,703,351            | \$14,486            | 1,052                     |
| F      | 50-65 | Osteoarthritis                    | Other central and peripheral nervous system disorders | \$43,931,227            | \$14,013            | 1,045                     |
| F      | 50-65 | Hypertension                      | Other central and peripheral nervous system disorders | \$61,441,249            | \$13,433            | 1,525                     |
| F      | 50-65 | Hypertension                      | Asthma, COPD, other chronic lung disease              | \$57,028,007            | \$12,193            | 1,559                     |
| F      | 50-65 | Hyperlipidemia                    | Other central and peripheral nervous system disorders | \$50,790,724            | \$12,105            | 1,399                     |
| M      | 65+   | Hypertension                      | Hyperlipidemia                                        | \$40,441,616            | \$11,933            | 1,130                     |
| F      | 50-65 | Esophageal disorder and GI ulcers | Diabetes mellitus                                     | \$39,891,768            | \$11,827            | 1,124                     |
| F      | 50-65 | Hyperlipidemia                    | Asthma, COPD, other chronic lung disease              | \$45,652,105            | \$11,757            | 1,294                     |

|   |       |                                   |                |              |          |       |
|---|-------|-----------------------------------|----------------|--------------|----------|-------|
| F | 50-65 | Esophageal disorder and GI ulcers | Osteoarthritis | \$42,200,192 | \$11,745 | 1,198 |
| F | 50-65 | Diabetes mellitus                 | Osteoarthritis | \$43,479,202 | \$11,591 | 1,250 |
